# Supplementary material for: DNA Damage- But Not Enzalutamide-Induced Senescence in Prostate Cancer Promotes Senolytic Bcl-xL Inhibitor Sensitivity
Source: MDPI journal article supplement (doi:10.3390/cells9071593), 2020-07-01
Supplement: s1 [file s1]

Figure S1

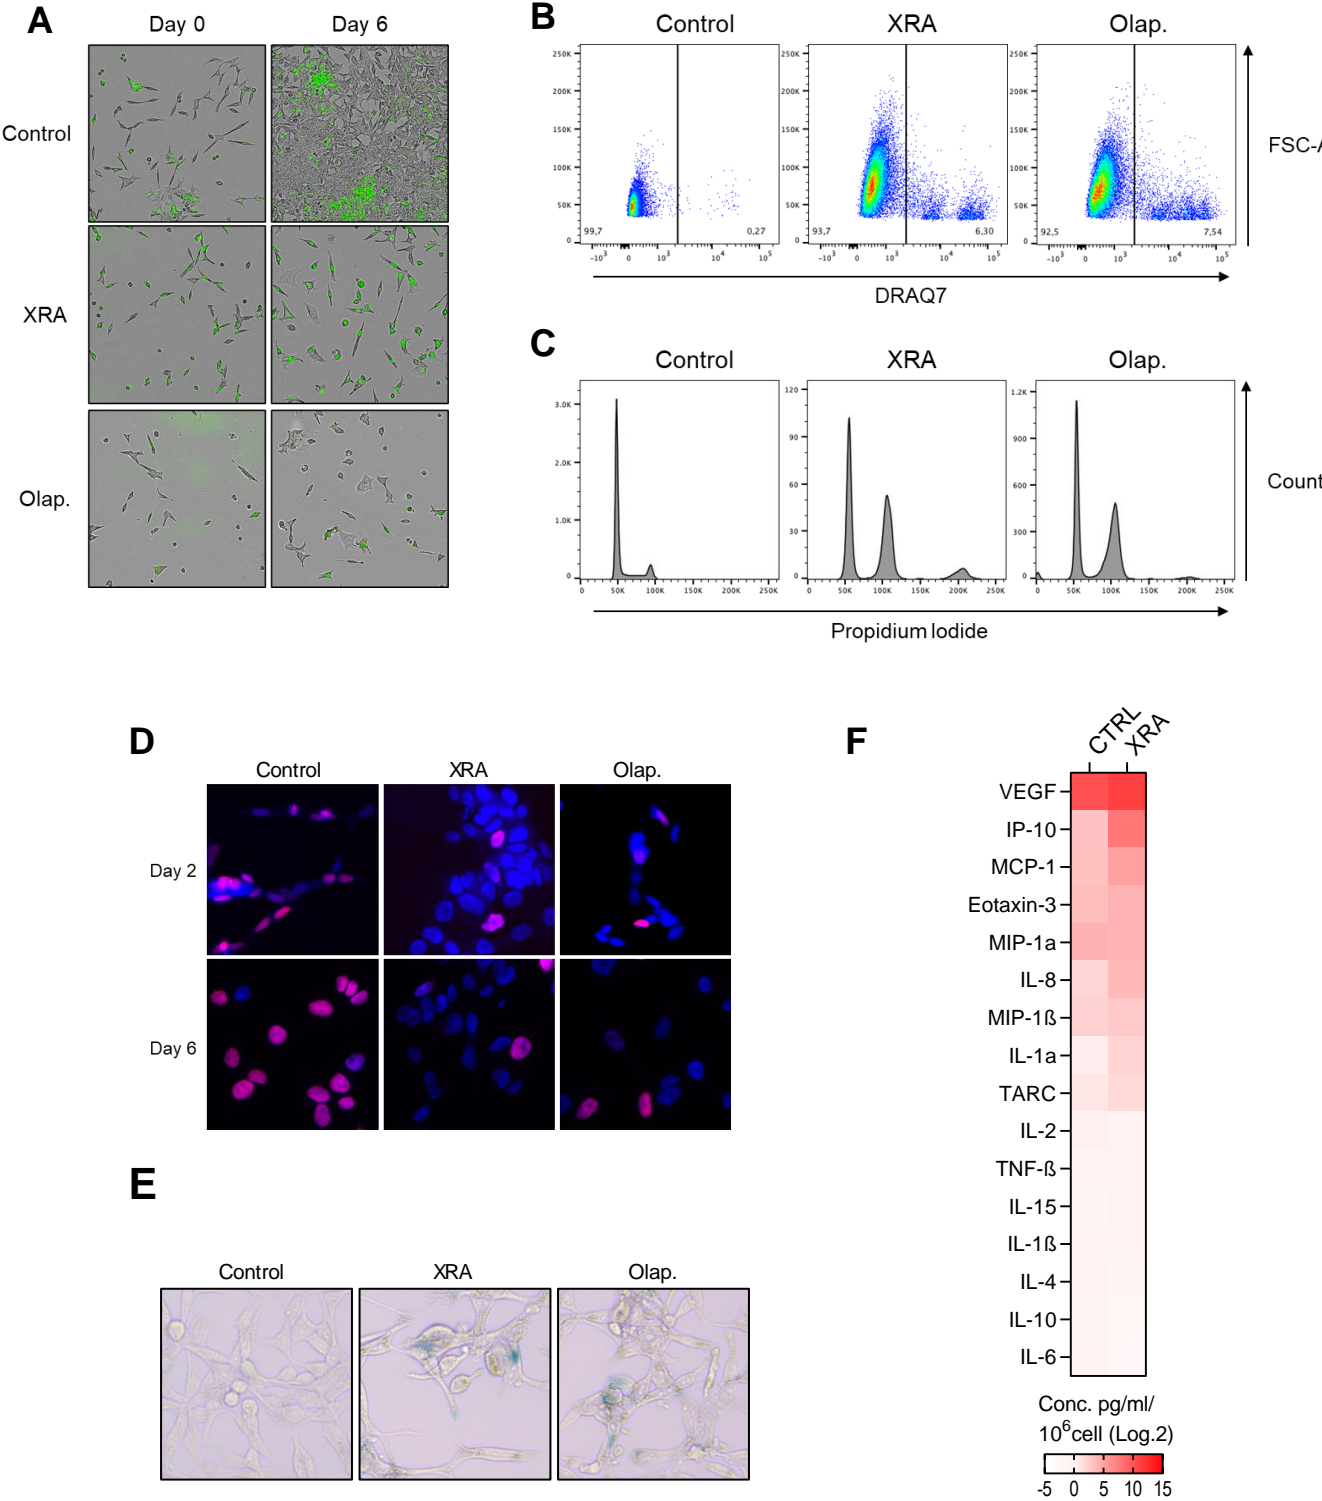

Figure S2

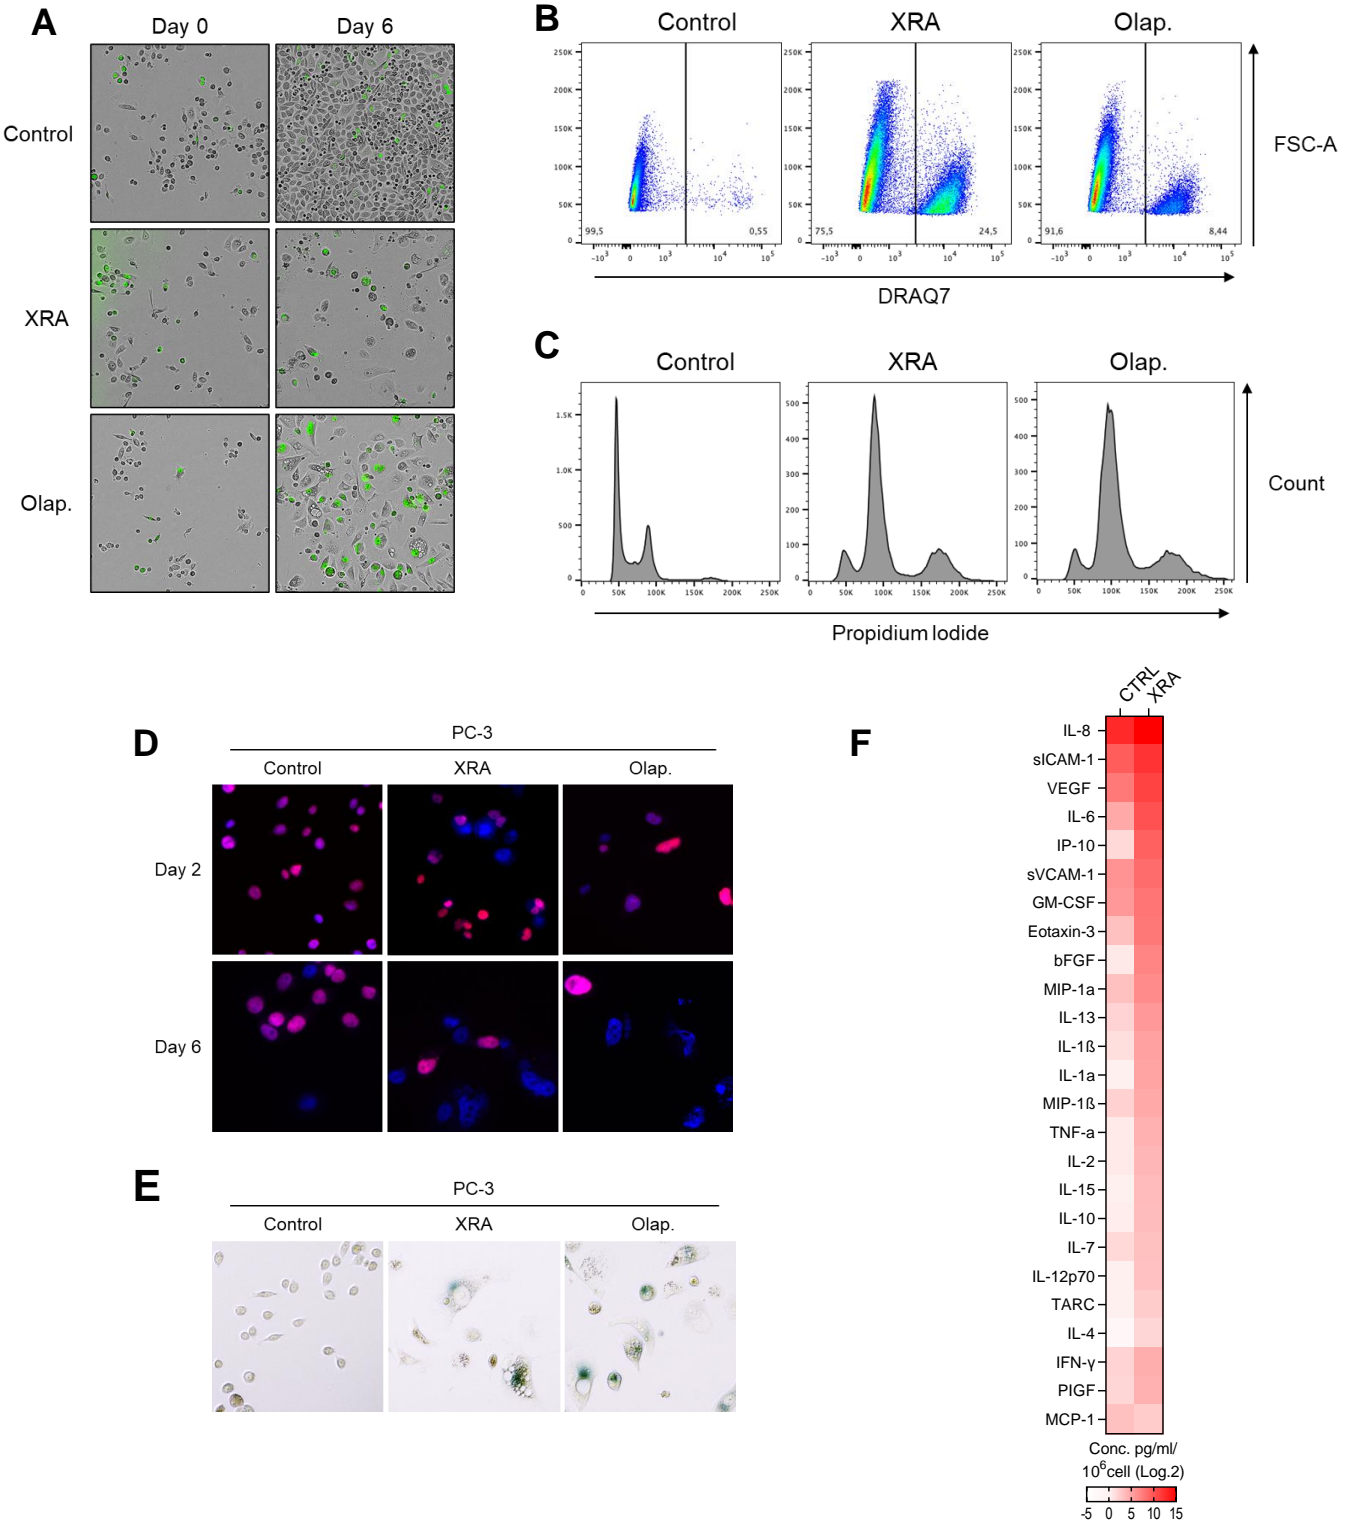

Figure S3

A

| Concentration (μM) |         |          |         |
|--------------------|---------|----------|---------|
|                    | ABT-263 | A115     | PPL     |
| S1                 | 0,3125  | 0,078125 | 0,15625 |
| S2                 | 0,625   | 0,15625  | 0,3125  |
| S3                 | 1,25    | 0,3125   | 0,625   |
| S4                 | 2,5     | 0,625    | 1,25    |
| S5                 | 5       | 1,25     | 2,5     |

B

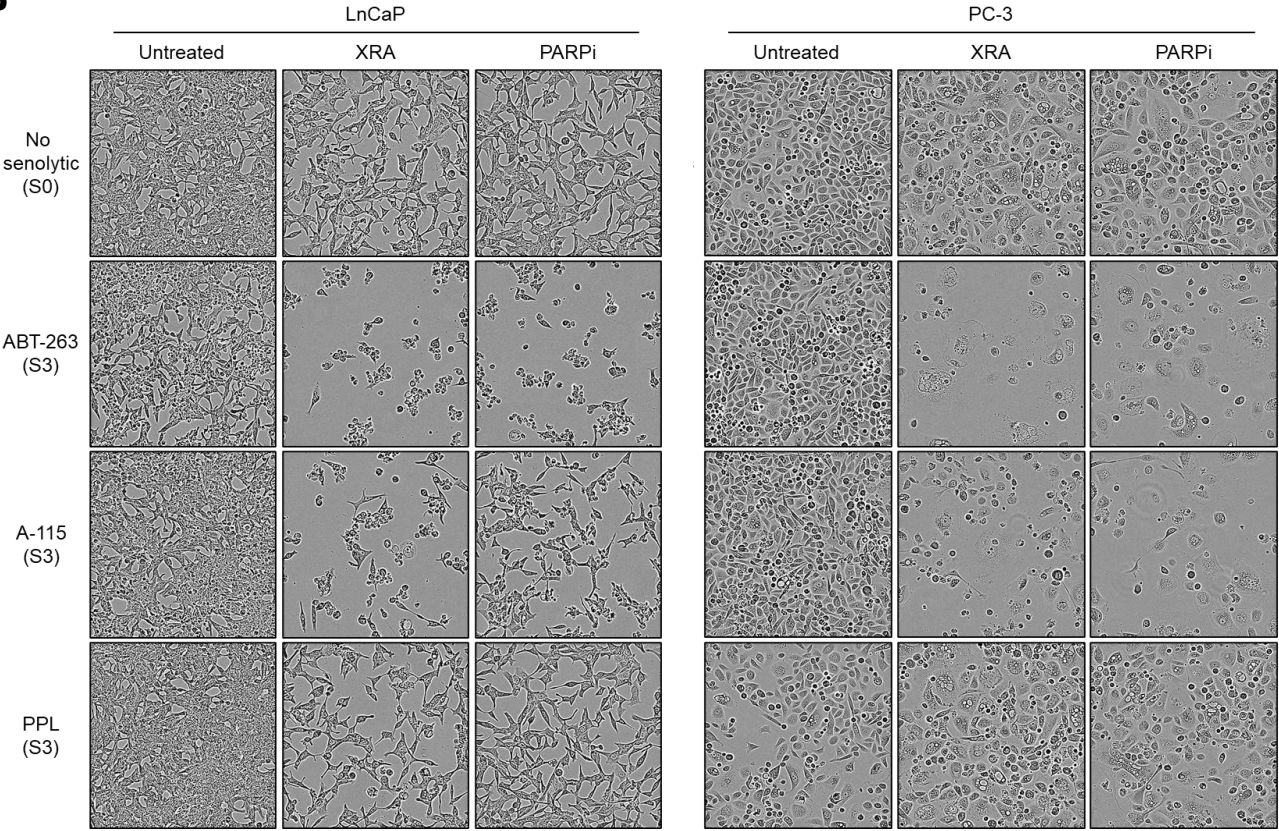

Figure S4

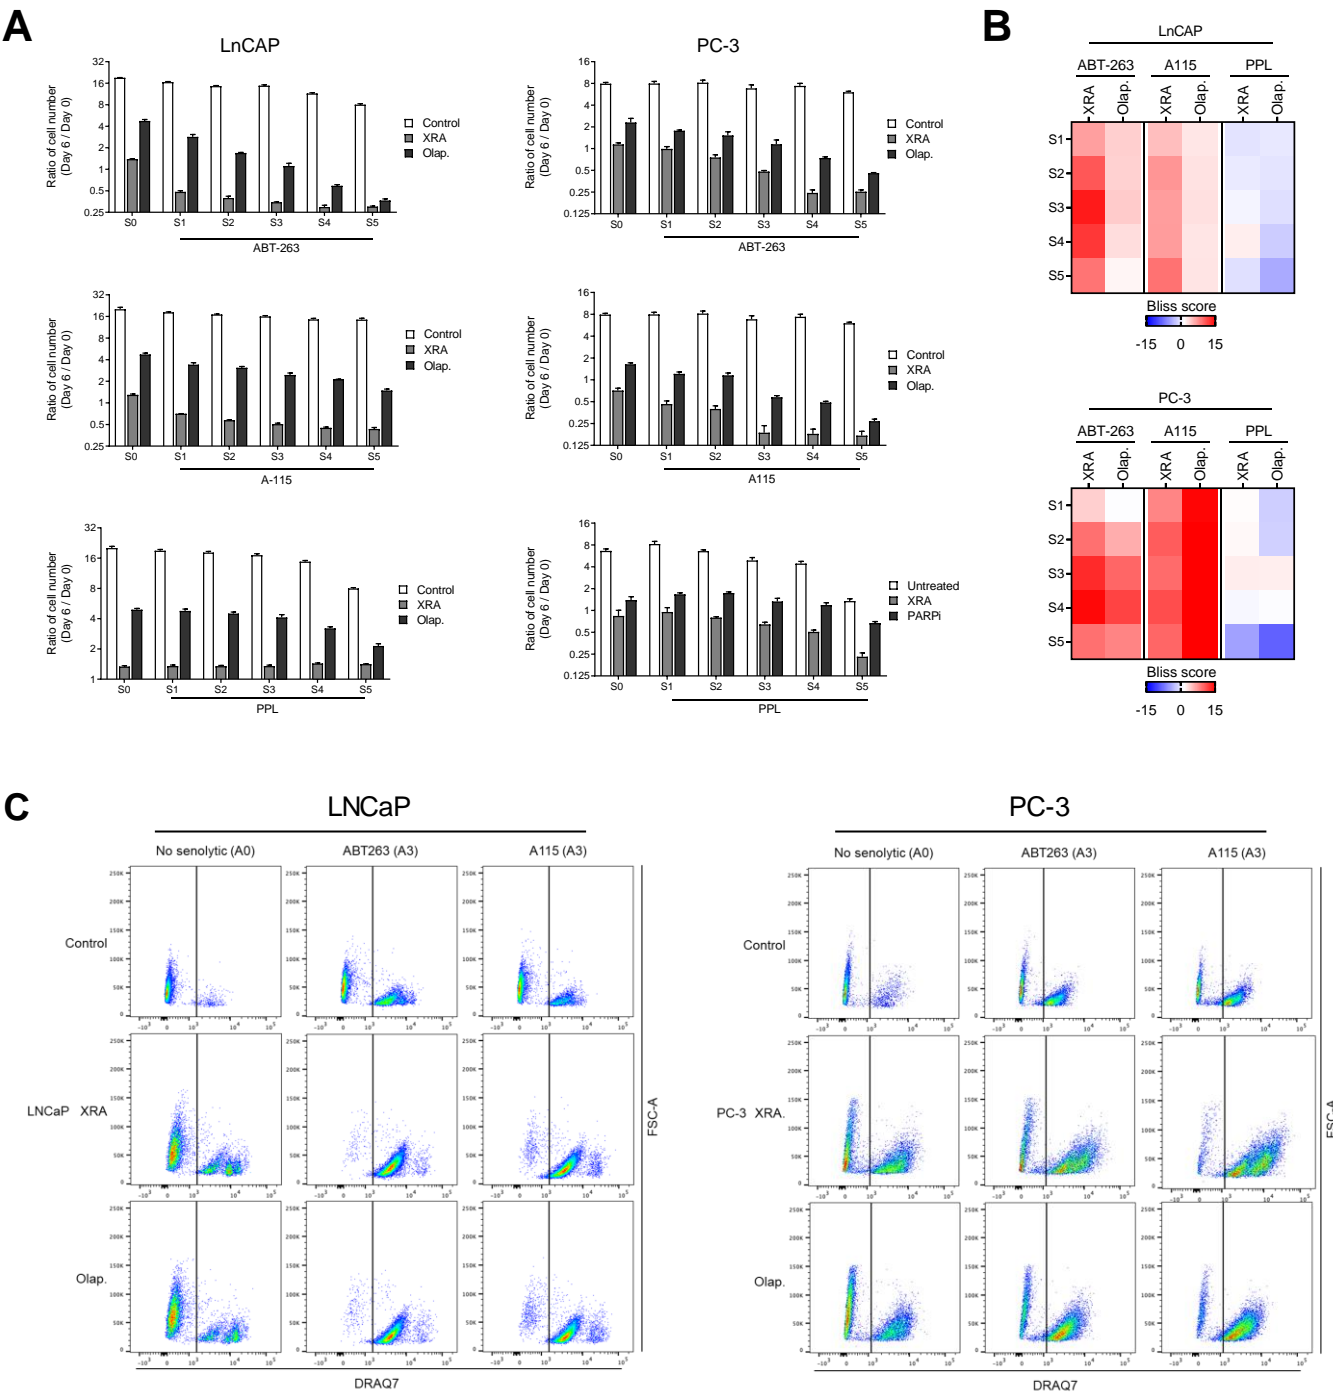

Figure S5

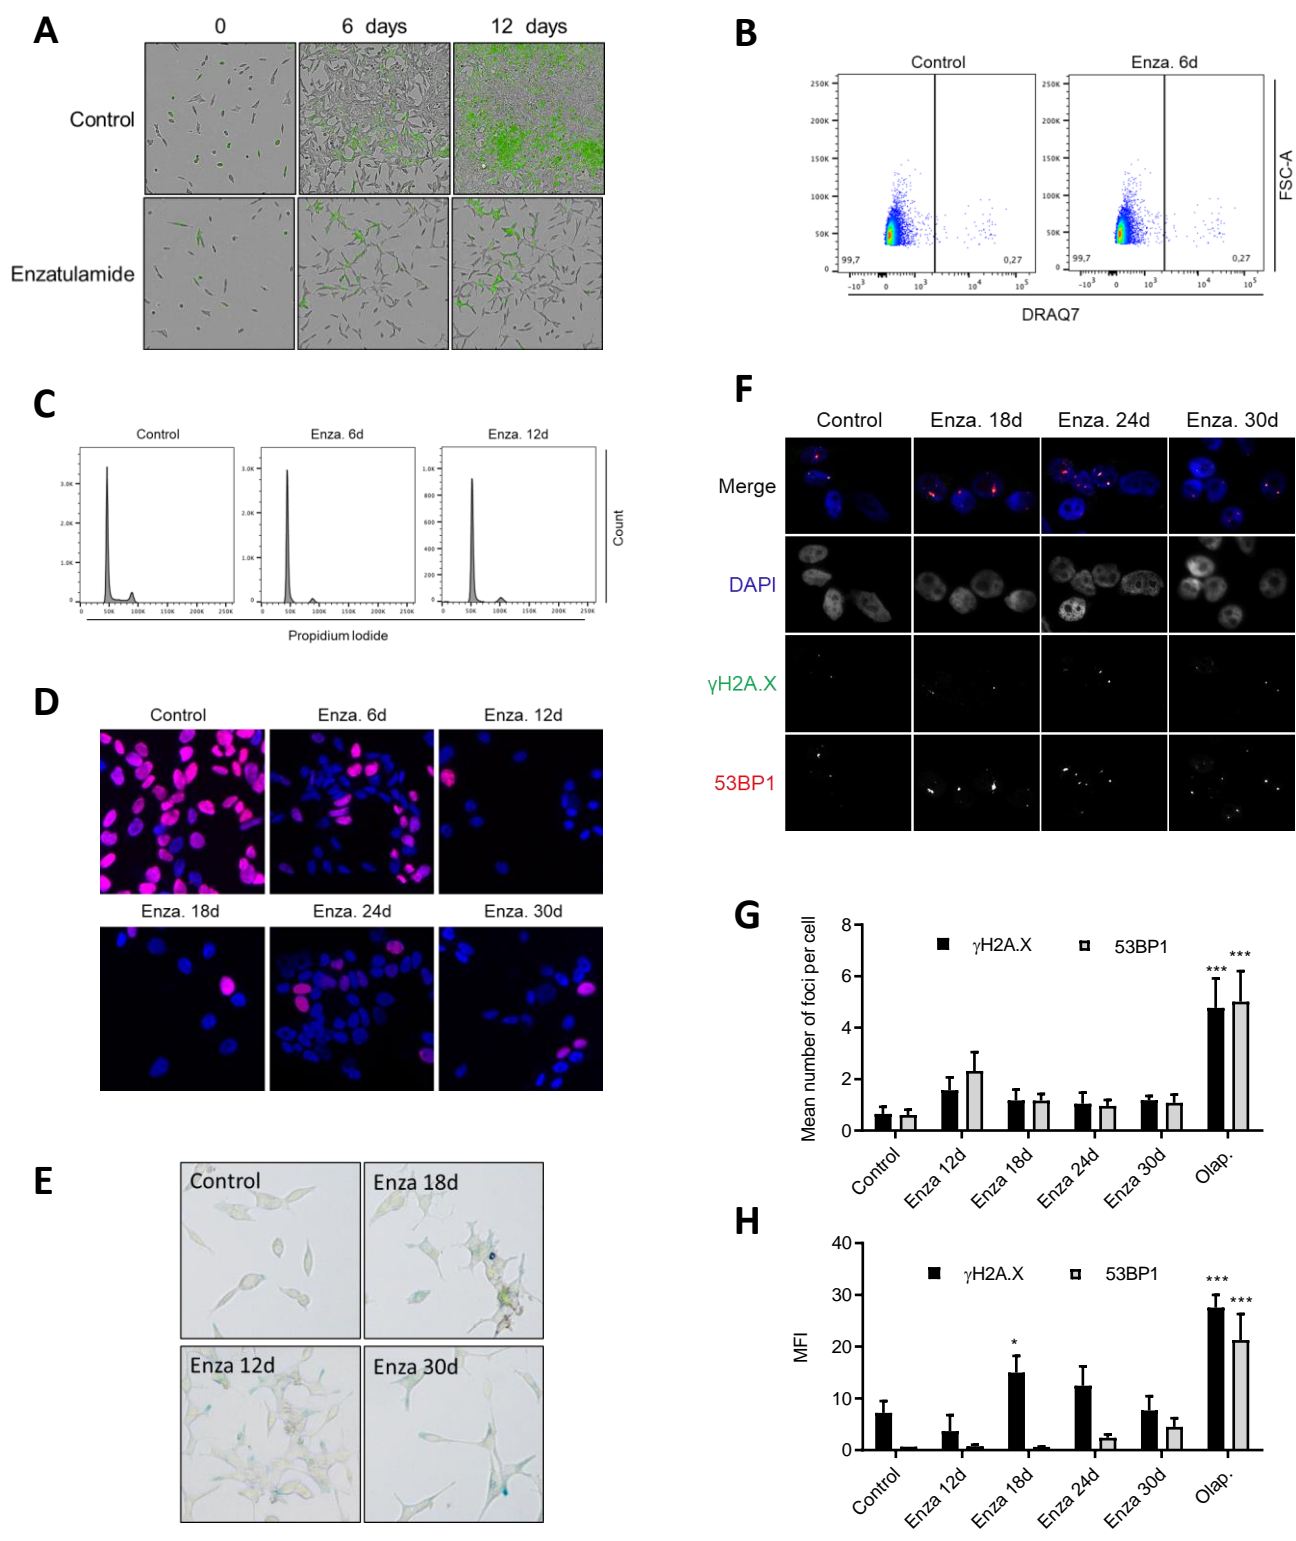

Figure S6

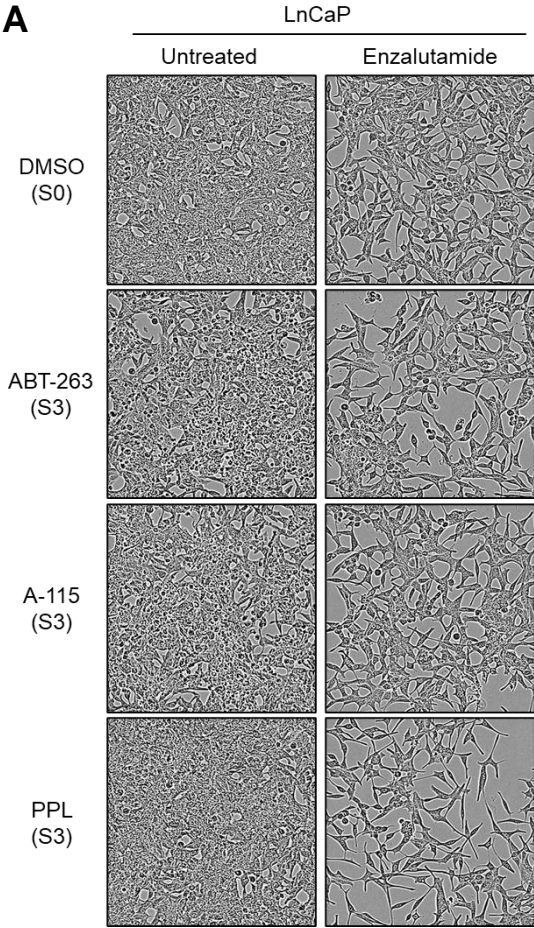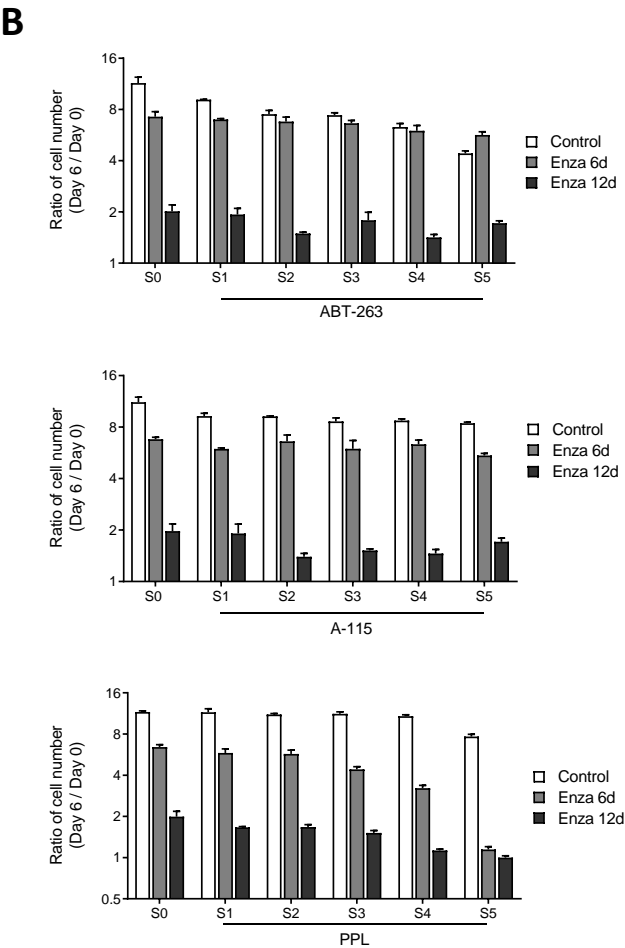

Table S1

| Target  | Forward (5'-3')          | Reverse (5'-3')           |
|---------|--------------------------|---------------------------|
| p15     | GAATGCGCGAGGAGAACAAG     | CATCATCATGACCTGGATCGC     |
| p16     | GGGAGCAGCATGGAGCCT       | ATGACCTGGATCGGCCTCCGACCGT |
| p21     | GGGACAGCAGAGGAAGAC       | TGGAGTGGTAGAAATCTGTCA     |
| p27     | TCCGGCTAACTCTGAGGACA     | GTAGAAGAATCGTCGGTTGC      |
| p53     | GGAAGACTCCAGTGGTAATCTA   | TTGGGCAGTGCTCGCTTA        |
| p57     | GCGGTGAGCCAATTTAGAGC     | CGGTTGCTGCTACATGAACG      |
| IL-8    | GCCAACACAGAAATTATTGTAAAG | TTATGAATTCTCAGCCCTCTTC    |
| IL-6    | TGTGTGAAAGCAGCAAAGA      | GGCAAGTCTCCTCATTGAA       |
| Il-1α   | ACCAGTGCTGCTGAAGGAGAT    | TCTTAGTGCCGTGAGTTTCCC     |
| IL-1β   | AGAAGTACCTGAGCTCGCCA     | CTGGAAGGAGCACTTCATCTGT    |
| GM-CSF  | CATGTGAATGCCATCCAGGA     | CAGGCCCACATTCTCTCACTT     |
| IGFBP-2 | GCCCTCTGGAGCACCTCTACT    | CATCTTGCACTGTTTGAGGTTGTAC |
