# Supplementary material for: DNA Damage- But Not Enzalutamide-Induced Senescence in Prostate Cancer Promotes Senolytic Bcl-xL Inhibitor Sensitivity
Source: MDPI journal article supplement (doi:10.3390/cells9071593), 2020-07-01
Supplement: s1 [file s1]

## Supplementary figure 1

**A)** Representative images of LNCaP expressing H2B-GFP (green) at 0 or 6 days after 8 Gy XRA or 5  $\mu$ M Olap treatment. **B)** The cumulative cell death of LNCaP was analyzed by flow cytometry 6 days after 8 Gy XRA or 5  $\mu$ M Olap treatment. **C)** Flow cytometry analysis of cell cycle populations after 8 Gy XRA or 5  $\mu$ M Olap treatment. **D)** Representative images of LNCaP cells that incorporated EdU for 24 hours at 1 or 5 days after 8 Gy XRA or 5  $\mu$ M Olap treatment. The merged red (EdU) and blue (DAPI) channels show colocalization in purple. **E)** Representative images of SA- $\beta$ -gal assay performed on LNCaP cells 6 days after 8 Gy XRA or 5  $\mu$ M Olap treatment. **F)** Levels of secreted cytokines were measured by MSD serum-based multiplex assay 6 days after 8 Gy XRA.

## Supplementary figure 2

**A)** Representative images of PC-3 expressing H2B-GFP (green) 0 or 6 days after 8 Gy of XRA or 5  $\mu$ M Olap treatment. **B)** The cumulative cell death of PC-3 was analyzed by flow cytometry 6 days after 8 Gy XRA or 5  $\mu$ M Olap treatment. **C)** Flow cytometry analysis of cell cycle populations after 8 Gy XRA or 5  $\mu$ M Olap treatment. **D)** Representative images of PC-3 cells that incorporated EdU for 24 hours at 1 or 5 days after 8 Gy XRA or 5  $\mu$ M Olap treatment. The merged red (EdU) and blue (DAPI) channels show colocalization in purple. **E)** Representative images of SA- $\beta$ -gal assay performed on PC-3 cells 6 days after 8 Gy XRA or 5  $\mu$ M Olap treatment. **F)** Levels of secreted cytokines were measured by MSD serum-based multiplex assay 6 days after 8 Gy XRA.

### Supplementary figure 3

**A)** Concentrations of ABT-263, A-115 and PPL that were used in senolysis experiments (Figures 3, 5 and 6). **B)** Representative images of LNCaP (left) and PC-3 (right) that were treated for 6 days with 8 Gy of XRA or 5  $\mu$ M Olap (PARPi) alone or in combination with 0.625  $\mu$ M ABT-263 (top), 0.3125  $\mu$ M A-115 (middle) or 0.625  $\mu$ M PPL (bottom). For all the data, the mean  $\pm$  SD of three independent experiments is shown. Data were analyzed using the two-tailed Student's t-test.

### Supplementary figure 4

**(A-B)** LNCaP or PC-3 expressing H2B-GFP were treated with 8 Gy of XRA or 5  $\mu$ M Olap for 6 days, alone or in combination with increasing concentrations of ABT-263, A-115 or PPL. **A)** Cell survival histograms and **B)** Bliss scores heat maps for LNCaP and PC-3 that were exposed to the different combination treatments. S0 to S5 correspond to increasing senolytic concentrations (see Figure S3A). **(A)** Data are the mean  $\pm$  SEM of triplicate and are representatives of three independent experiments. **C)** Flow cytometry analysis of LNCaP (left) or PC-3 (right) cell death 6 days after 8 Gy XRA or 5  $\mu$ M Olap treatment alone or in combination with 0.625  $\mu$ M ABT-263 or 0.3125  $\mu$ M A-115.

### Supplementary figure 5

**A)** Representative images of LNCaP expressing H2B-GFP (green) at 0, 6 or 12 days following 10  $\mu$ M Enza treatment. **B)** The cumulative cell death of LNCaP was analyzed by flow cytometry (DRAQ7 staining) 6 days after 10  $\mu$ M Enza treatment. **C)** Flow cytometry analysis of cell cycle populations following 6 or 12 days 10  $\mu$ M Enza exposure. **D)** Representative images of LNCaP cells that incorporated EdU for 24 hours, 6, 12, 18, 24 or 30 days following 10  $\mu$ M Enza exposure. The merged red (EdU) and blue (DAPI) channels show colocalization in purple. **E)**

Representative images of SA- $\beta$ -gal assay performed on LNCaP cells following 12, 18 or 30 days of 10  $\mu$ M Enza exposure. **F)** Representative images of  $\gamma$ H2AX (green) and 53BP1 (red) foci per nucleus in LNCaP cells following 6, 12, 18, 24 or 30 days of 10  $\mu$ M Enza exposure. The merged red and green channels show colocalization in yellow and DAPI is shown in blue. **(G-H)** Quantification of  $\gamma$ H2AX and 53BP1 foci G) number or H) mean fluorescence intensity (MFI) per nucleus. Data are the mean  $\pm$  SEM of triplicate and are representatives of three independent experiments. Two-way ANOVA. \*  $p < 0.05$ , \*\*\*  $p < 0.001$ .

### **Supplementary figure 6**

**A)** Representative images of LNCaP that were exposed 6 days to 10  $\mu$ M Enza, alone or in combination with 0.625  $\mu$ M ABT-263 (top), 0.3125  $\mu$ M A-115 (middle) or 0.625  $\mu$ M PPL (bottom). **B)** Cell survival histograms of LNCaP and PC-3 that were treated with 10  $\mu$ M Enza for 6 or 12 days, alone or in combination with increasing concentrations of ABT-263 (top), A-115 (middle) or PPL (bottom). S0 to S5 correspond to increasing senolytics concentrations (see Figure S3A). Data are the mean  $\pm$  SD of triplicate and are representatives of three independent experiments.

### **Supplementary Table 1**

Forward and reverse primers that were used to detect CDKi and SASP gene transcripts in Q-PCR experiments.
